# Supplementary material
Source: ML conference proceedings conference paper supplement (https://openreview.net/forum?id=BkWFJN7_bQ)

**a.** Ground Truth

- Source
- Target

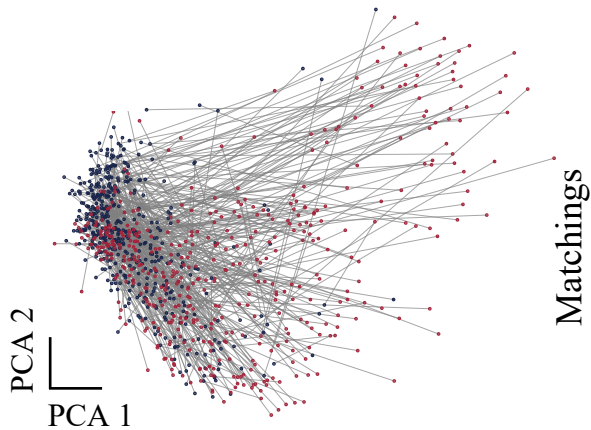

Trajectories

Matchings

**b.** FBSB  
Chen et al., (2022)

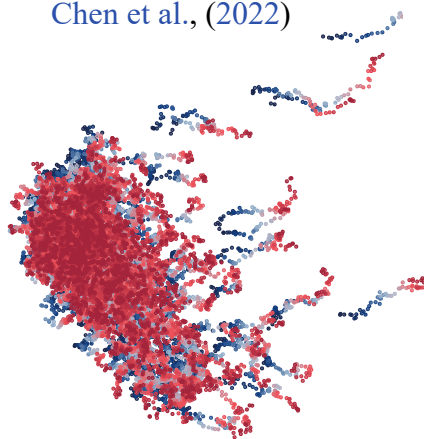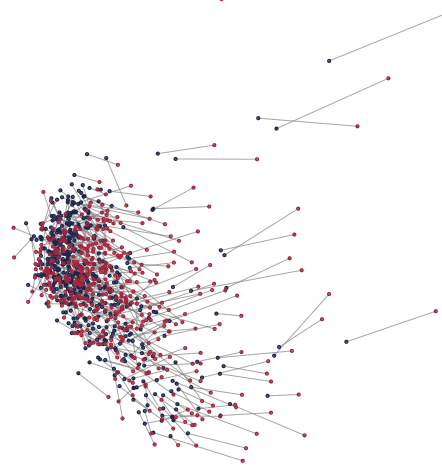

**c.** SBALIGN  
Ours

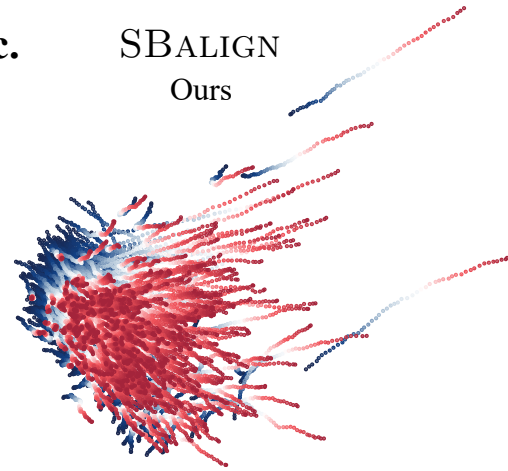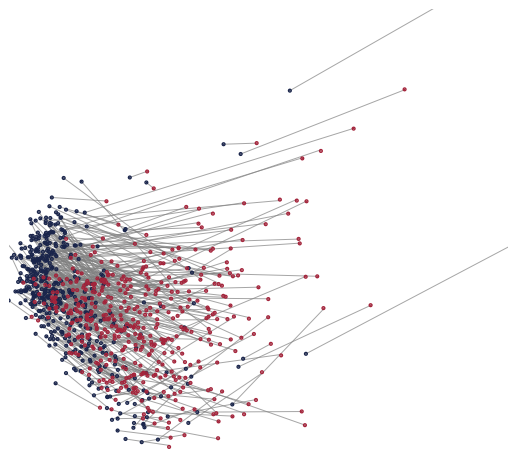

**d.** FBSB with SBALIGN  
Ours

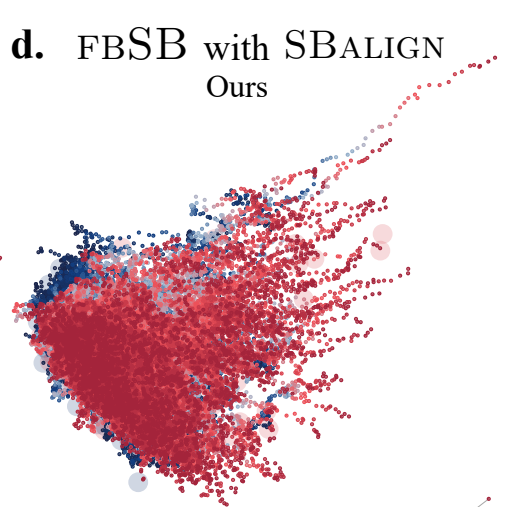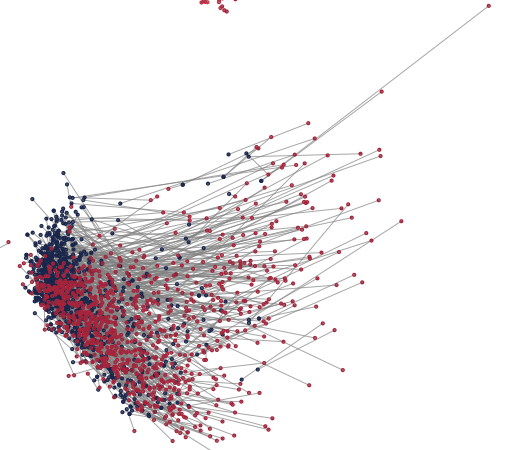

Supplement: supplementary_material [file attachment]
