# Supplementary material
Source: ML conference proceedings conference paper supplement (https://openreview.net/forum?id=BkWFJN7_bQ)

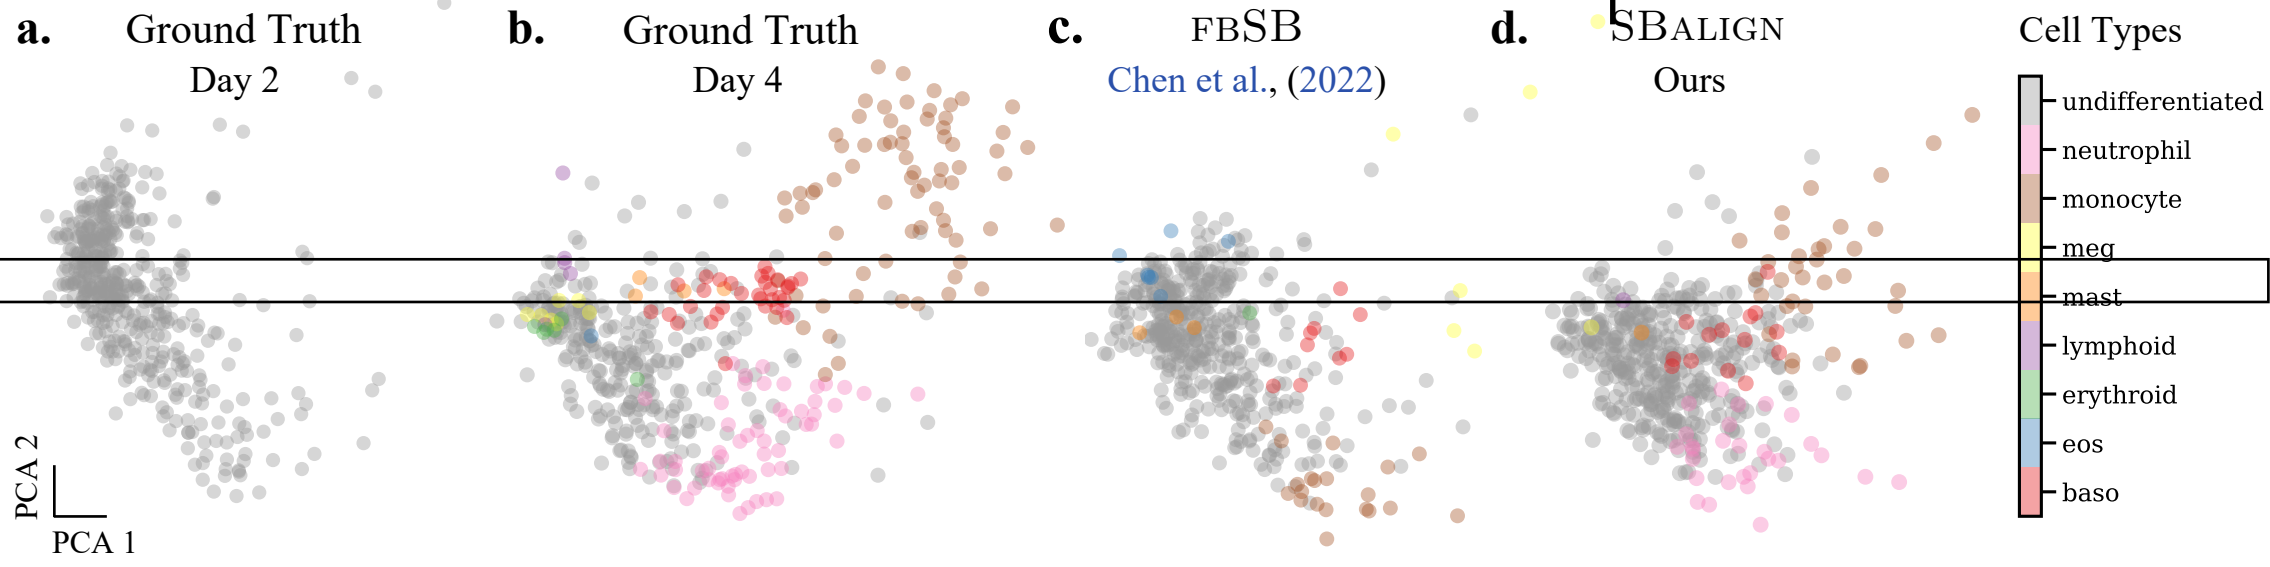

Supplement: supplementary_material [file attachment]

**a.** Ground Truth

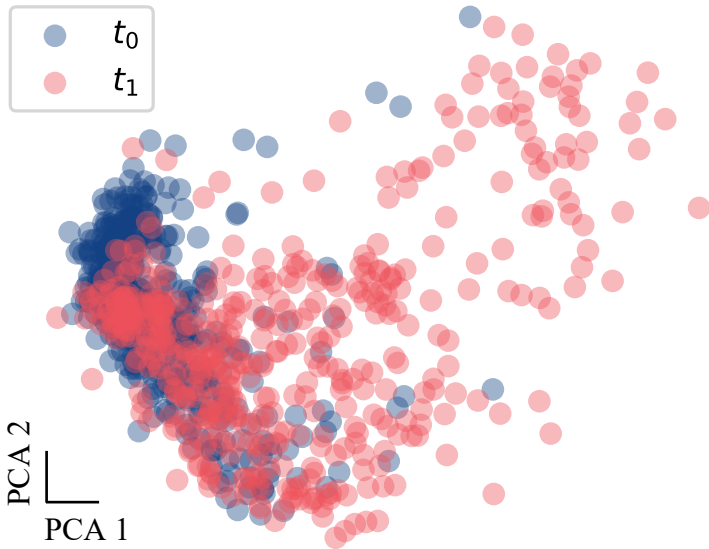

**b.** SBALIGN  
Ours

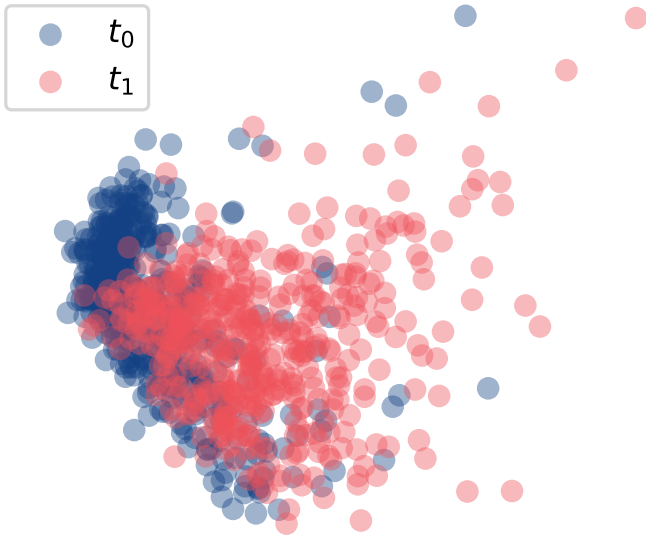

Supplement: supplementary_material [file attachment]

**a.**

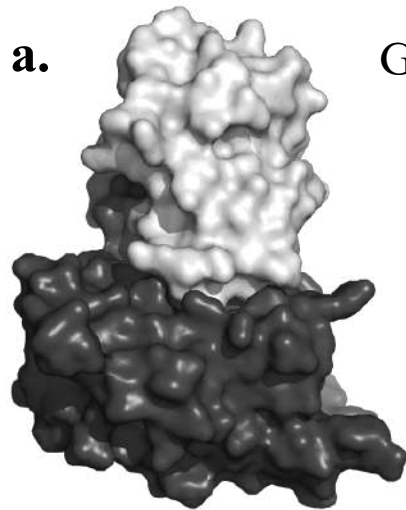

Ground Truth  
**1NW9**

**b.**

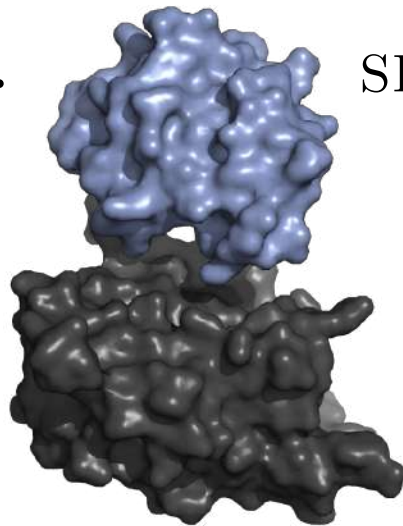

SBALIGN  
Ours

**c.**

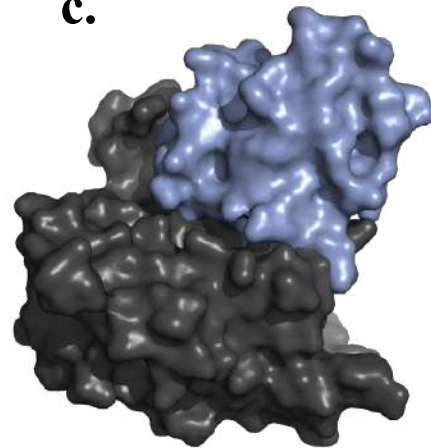

EQUIDOCK  
Ganea et al., (2022)

Supplement: supplementary_material [file attachment]

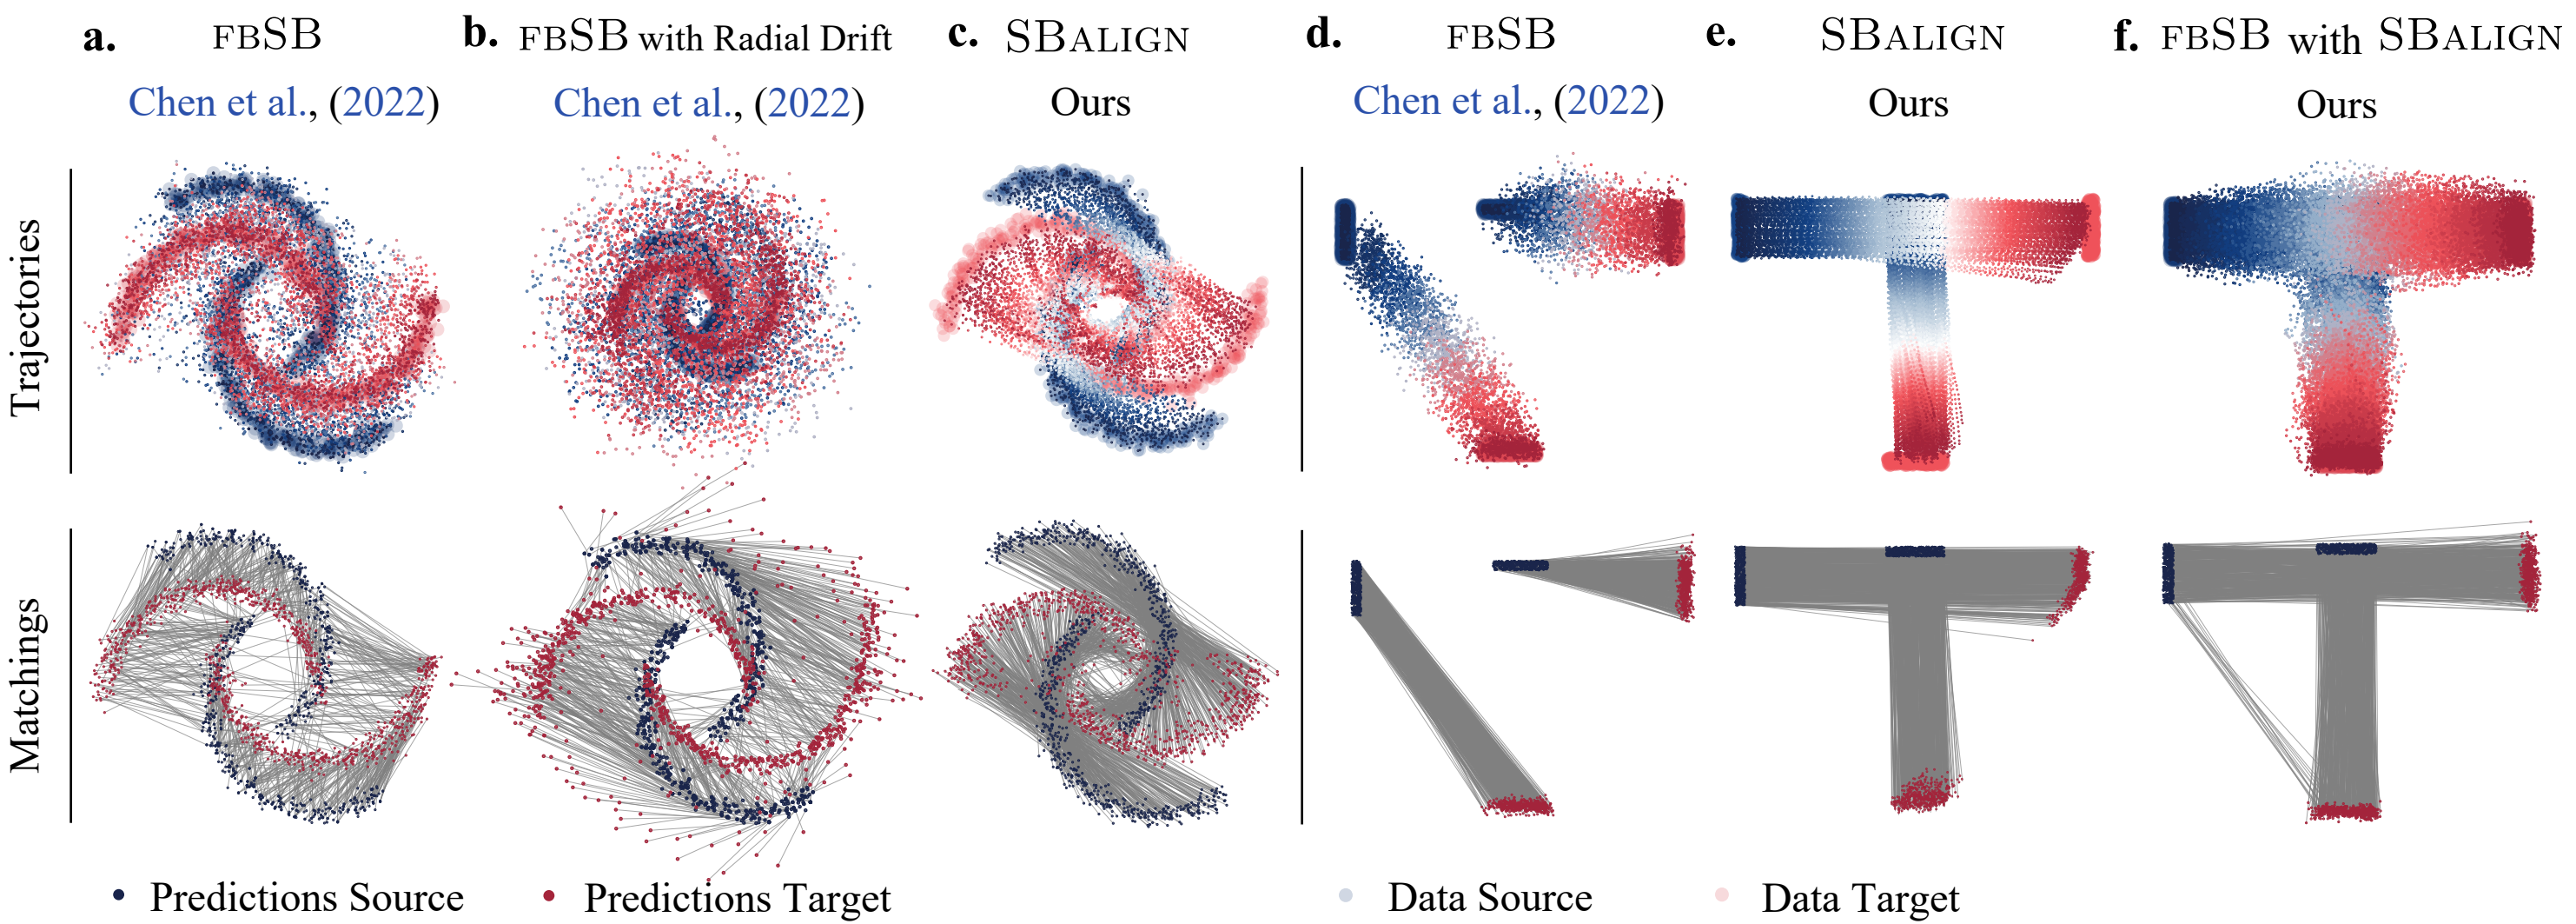

Supplement: supplementary_material [file attachment]

**a.**

Ground Truth

[1JIW](#)

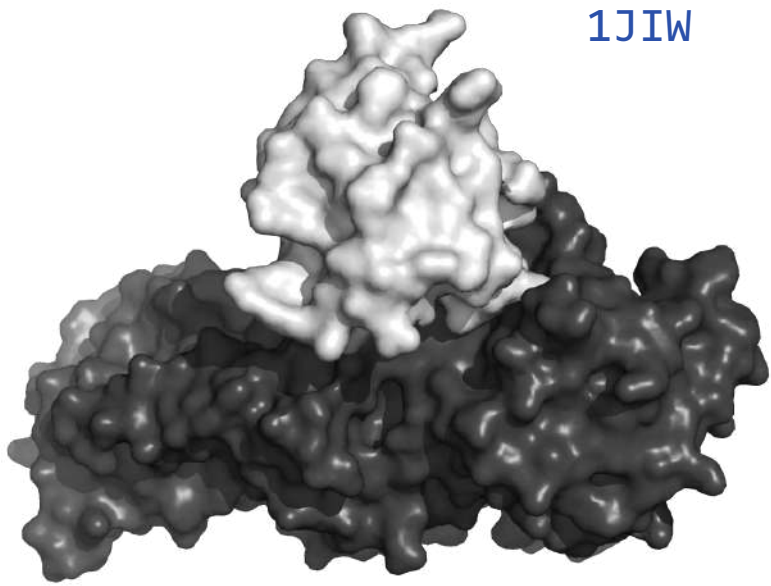

**b.**

SBALIGN

Ours

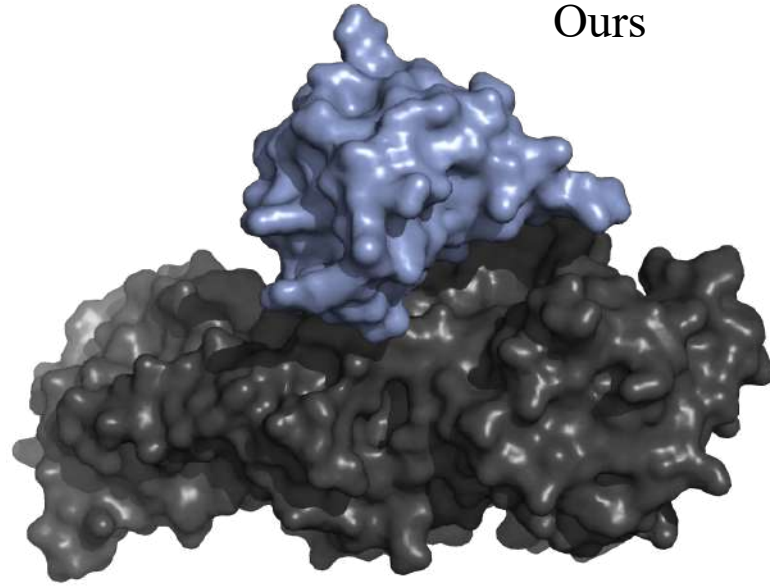

**c.**

EQUIDOCK

[Ganea et al., \(2022\)](#)

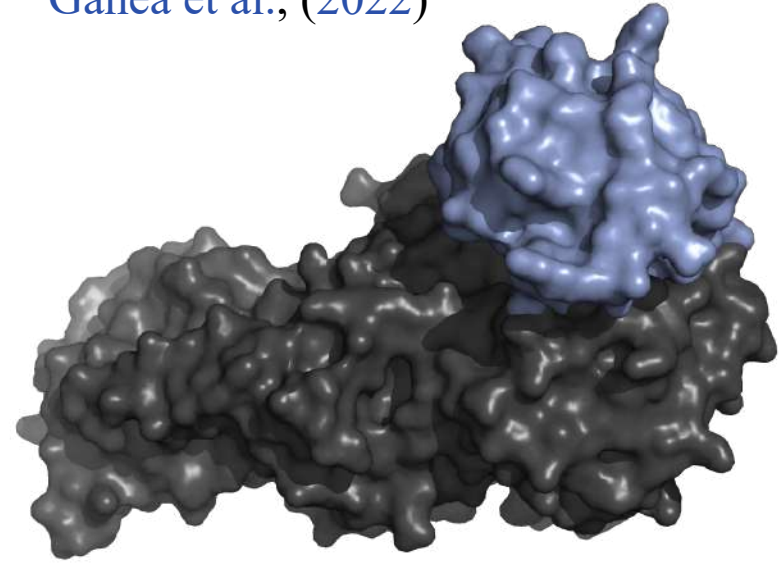

Supplement: supplementary_material [file attachment]

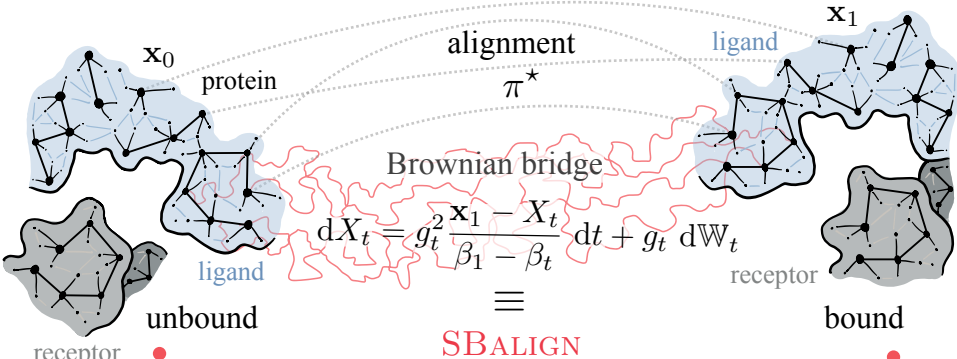

$$dX_t = g_t^2 [b_t^\theta(X_t) + \nabla \log h_t^\theta(X_t)] dt + g_t dW_t$$

Supplement: supplementary_material [file attachment]

**a.**

Ground Truth  
[1QA9](#)

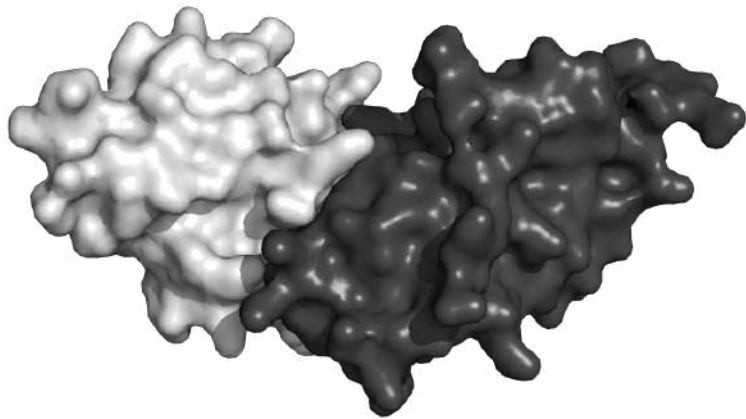

**b.**

SBALIGN  
Ours

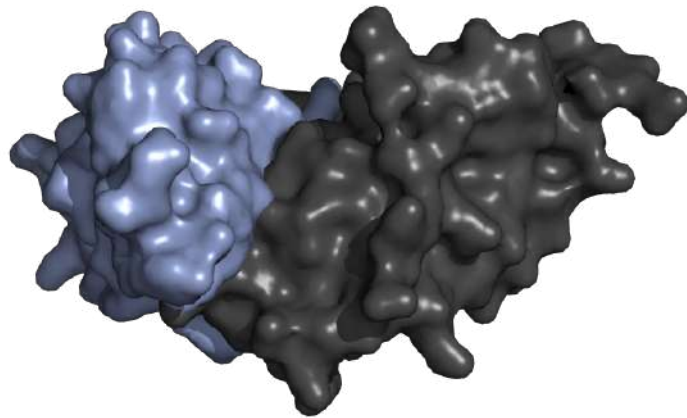

**c.**

EQUIDOCK  
[Ganea et al., \(2022\)](#)

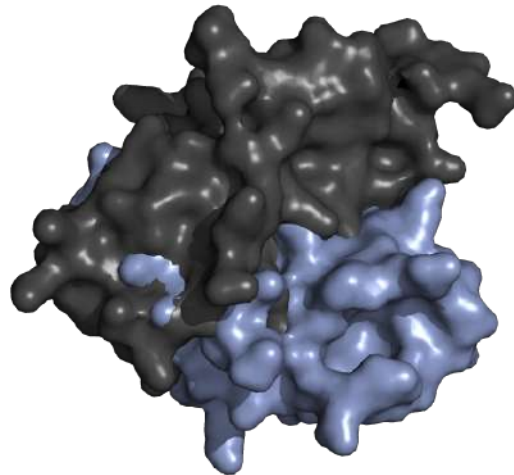

Supplement: supplementary_material [file attachment]

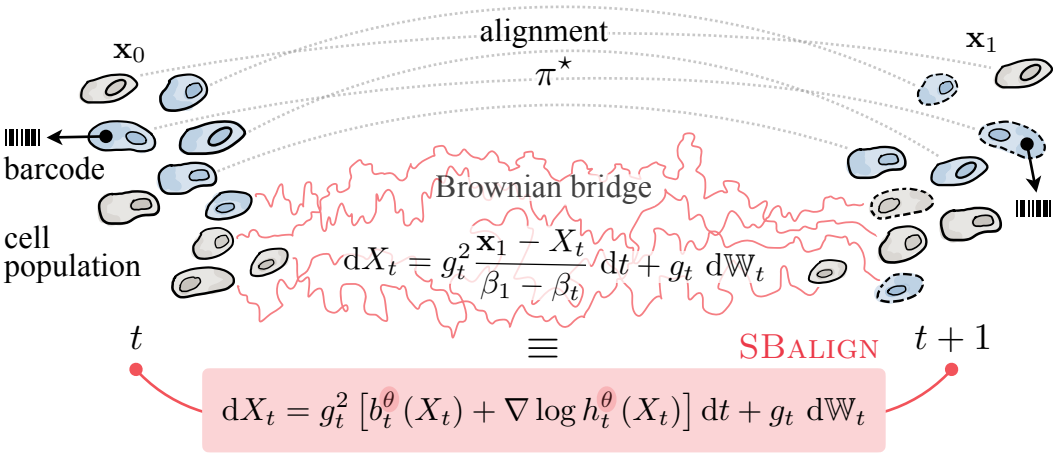

Supplement: supplementary_material [file attachment]

**a.** Spiral Dataset

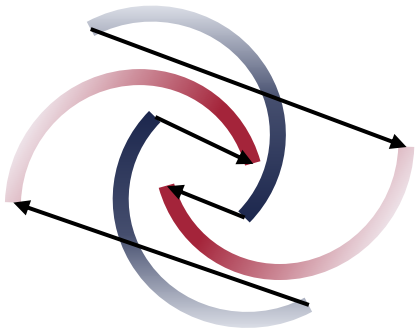

**b.** T Dataset

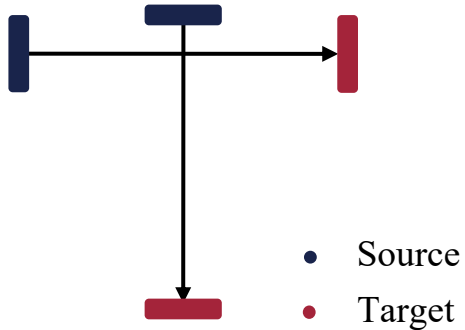

Supplement: supplementary_material [file attachment]
